# Supplementary material
Source: PubMed Central journal article supplement (PMC3909992)
Supplement: NIHMS531319-supplement-01.pdf [file NIHMS531319-supplement-01.pdf]

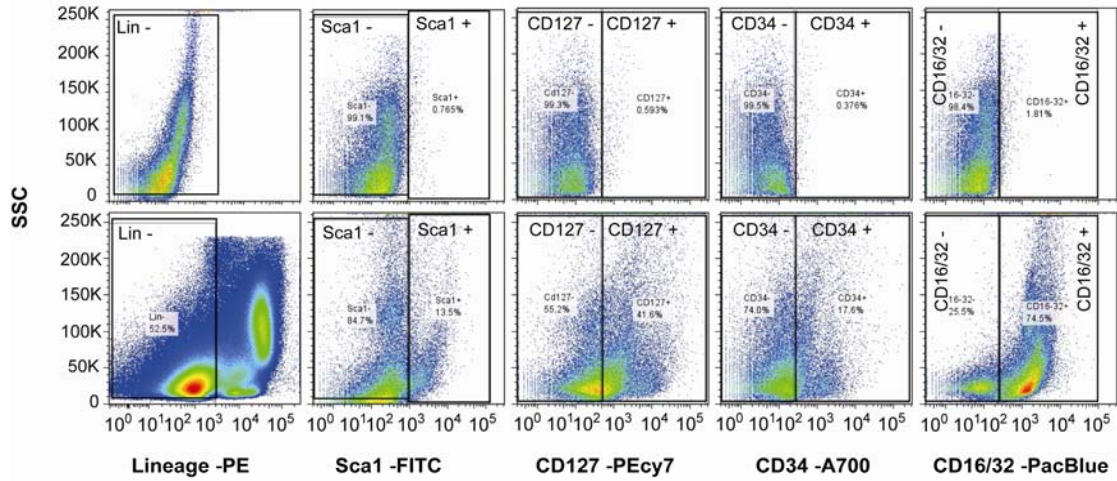

Supplementary Figure 1: Representative unstained and single color controls used in Figures 3A and 3E. Unstained cells were compared to cells stained with a single antibody (or panel using the same fluorophore for Lineage) in order to set compensation for each color.
